# Supplementary material for: Exploring Acceptability Drivers of Oral Antibiotics in Children: Findings from an International Observational Study
Source: MDPI journal article supplement (doi:10.3390/pharmaceutics13101721), 2021-10-18
Supplement: s1 [file s1]

# Supplementary Materials: Exploring Acceptability Drivers of Oral Antibiotics in Children: Findings from an International Observational Study

Thibault Vallet, Yahya Bensouda, Jumpei Saito, Liv Mathiesen, Varsha Pokharkar, Viviane Klingmann, Matthew Peak, Omar Elhamdaoui, Akimasa Yamatani, Ivana Ivanovic, Manjusha Sajith, Juliane Münch, Louise Bracken, Jennifer C. Duncan, Smita Salunke, Siri Wang, Fabrice Ruiz

**Table S1.** Characteristics of the patients and products focusing on oral liquid formulations of antibiotics in toddlers and preschoolers in the study, stratified by administration device.

| Characteristics                                                                                                     | Oral syringe<br>(n = 129) | Measuring spoon<br>(n = 114) | Statistical<br>Test |
|---------------------------------------------------------------------------------------------------------------------|---------------------------|------------------------------|---------------------|
| <b>Sex</b>                                                                                                          |                           |                              | $\chi^2$ : $p=.24$  |
| Girl                                                                                                                | 55 (43)                   | 58 (51)                      |                     |
| Boy                                                                                                                 | 73 (57)                   | 55 (49)                      |                     |
| missing data                                                                                                        | 1                         | 1                            |                     |
| <b>Age group</b>                                                                                                    |                           |                              | $\chi^2$ : $p=.25$  |
| Toddlers (2y.)                                                                                                      | 55 (43)                   | 58 (51)                      |                     |
| Preschoolers (3-5y.)                                                                                                | 74 (57)                   | 56 (49)                      |                     |
| <b>Treatment exposure</b>                                                                                           |                           |                              | $\chi^2$ : $p=.08$  |
| Previous exposure                                                                                                   | 51 (40)                   | 59 (52)                      |                     |
| First exposure                                                                                                      | 78 (60)                   | 55 (48)                      |                     |
| <b>Setting</b>                                                                                                      |                           |                              | $\chi^2$ : $p=.002$ |
| Community                                                                                                           | 60 (47)                   | 76 (67)                      |                     |
| Hospital                                                                                                            | 69 (53)                   | 38 (33)                      |                     |
| <b>Country</b>                                                                                                      |                           |                              | $\chi^2$ : $p<.001$ |
| France                                                                                                              | 61 (47)                   | 70 (61)                      |                     |
| Morocco                                                                                                             | 45 (35)                   | 21 (18)                      |                     |
| Norway                                                                                                              | 0 (0)                     | 15 (13)                      |                     |
| Germany                                                                                                             | 18 (14)                   | 3 (3)                        |                     |
| England                                                                                                             | 5 (4)                     | 5 (4)                        |                     |
| <b>5<sup>th</sup> level (chemical substance) of the Anatomical Therapeutic Chemical (ATC) classification system</b> |                           |                              | $\chi^2$ : $p<.001$ |
| Co-amoxiclav                                                                                                        | 57 (44)                   | 5 (4)                        |                     |
| Amoxicillin                                                                                                         | 0 (0)                     | 50 (44)                      |                     |
| Cefpodoxime                                                                                                         | 16 (12)                   | 16 (14)                      |                     |
| Cefixime                                                                                                            | 26 (20)                   | 0 (0)                        |                     |
| Josamycin                                                                                                           | 23 (18)                   | 0 (0)                        |                     |
| Fusidic acid                                                                                                        | 0 (0)                     | 21 (18)                      |                     |
| Phenoxymethylpenicillin                                                                                             | 0 (0)                     | 15 (13)                      |                     |
| Other (<5%)                                                                                                         | 7 (5)                     | 7 (6)                        |                     |
| <b>Pharmaceutical form categories</b>                                                                               |                           |                              | $\chi^2$ : $p<.001$ |
| Reconstituted oral liquids                                                                                          | 129 (100)                 | 86 (75)                      |                     |
| Ready to-use oral liquids                                                                                           | 0 (0)                     | 28 (25)                      |                     |
| <b>Flavor composition</b>                                                                                           |                           |                              | $\chi^2$ : $p<.001$ |
| Strawberry                                                                                                          | 68 (53)                   | 0 (0)                        |                     |
| Lemon ; orange ; peach-apricot                                                                                      | 18 (14)                   | 26 (23)                      |                     |

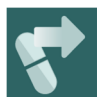

---

|                            |         |         |
|----------------------------|---------|---------|
| Banana                     | 7 (5)   | 16 (14) |
| Banana ; orange            | 0 (0)   | 21 (18) |
| E99 294 55                 | 19 (15) | 0 (0)   |
| Lemon ; peach ; strawberry | 0 (0)   | 16 (14) |
| Dark cherry                | 0 (0)   | 13 (11) |
| Orange ; caramel           | 0 (0)   | 12 (11) |
| Lemon ; orange             | 9 (7)   | 0 (0)   |
| Other (<5%)                | 8 (6)   | 10 (9)  |

---

<sup>a</sup>  $\chi^2$ : Pearson's Chi-squared Test p-value

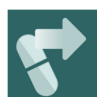**Table S2.** Characteristics of the patients and products focusing on oral liquid formulations of antibiotics in toddlers and preschoolers in the study, stratified by place of administration.

| Characteristics                                                                                                     | Hospital<br>(n = 200) | Home<br>(n = 157) | Statistical<br>Test |
|---------------------------------------------------------------------------------------------------------------------|-----------------------|-------------------|---------------------|
| <b>Sex</b>                                                                                                          |                       |                   | $\chi^2$ : $p=.38$  |
| Girl                                                                                                                | 96 (48)               | 67 (43)           |                     |
| Boy                                                                                                                 | 103 (52)              | 89 (57)           |                     |
| missing data                                                                                                        | 1                     | 1                 |                     |
| <b>Age group</b>                                                                                                    |                       |                   | $\chi^2$ : $p=.21$  |
| Toddlers (2y.)                                                                                                      | 90 (45)               | 82 (52)           |                     |
| Preschoolers (3-5y.)                                                                                                | 110 (55)              | 75 (48)           |                     |
| <b>Treatment exposure</b>                                                                                           |                       |                   | $\chi^2$ : $p=.76$  |
| Previous exposure                                                                                                   | 81 (40)               | 67 (43)           |                     |
| First exposure                                                                                                      | 119 (60)              | 90 (57)           |                     |
| <b>Country</b>                                                                                                      |                       |                   | $\chi^2$ : $p<.001$ |
| France                                                                                                              | 10 (5)                | 123 (78)          |                     |
| Morocco                                                                                                             | 68 (34)               | 0 (0)             |                     |
| Japan                                                                                                               | 70 (35)               | 0 (0)             |                     |
| Norway                                                                                                              | 0 (0)                 | 34 (22)           |                     |
| India                                                                                                               | 15 (8)                | 0 (0)             |                     |
| Germany                                                                                                             | 21 (10)               | 0 (0)             |                     |
| England                                                                                                             | 16 (8)                | 0 (0)             |                     |
| <b>5<sup>th</sup> level (chemical substance) of the Anatomical Therapeutic Chemical (ATC) classification system</b> |                       |                   | $\chi^2$ : $p<.001$ |
| Co-amoxiclav                                                                                                        | 42 (21)               | 32 (20)           |                     |
| Amoxicillin                                                                                                         | 12 (6)                | 43 (27)           |                     |
| Sulfamethoxazole and trimethoprim                                                                                   | 34 (17)               | 3 (2)             |                     |
| Cefaclor                                                                                                            | 34 (17)               | 0 (0)             |                     |
| Cefpodoxime                                                                                                         | 1 (0)                 | 32 (20)           |                     |
| Cefixime                                                                                                            | 21 (10)               | 5 (3)             |                     |
| Phenoxymethylpenicillin                                                                                             | 3 (2)                 | 22 (14)           |                     |
| Josamycin                                                                                                           | 17 (8)                | 6 (4)             |                     |
| Fusidic acid                                                                                                        | 21 (10)               | 0 (0)             |                     |
| Other (<5%)                                                                                                         | 15 (8)                | 14 (9)            |                     |
| <b>Pharmaceutical form categories</b>                                                                               |                       |                   | $\chi^2$ : $p<.001$ |
| Reconstituted oral liquids                                                                                          | 153 (76)              | 153 (97)          |                     |
| Ready to-use oral liquids                                                                                           | 47 (24)               | 4 (3)             |                     |
| <b>Provided administration device</b>                                                                               |                       |                   | $F^b$ : $p<.001$    |
| Oral syringe                                                                                                        | 69 (36)               | 60 (44)           |                     |
| Measuring spoon                                                                                                     | 38 (20)               | 76 (55)           |                     |
| Device not provided                                                                                                 | 71 (37)               | 0 (0)             |                     |
| Measuring cup                                                                                                       | 15 (8)                | 0 (0)             |                     |
| Other (<5%)                                                                                                         | 0 (0)                 | 1 (1)             |                     |
| missing data                                                                                                        | 7                     | 20                |                     |
| <b>Flavor composition</b>                                                                                           |                       |                   | $\chi^2$ : $p<.001$ |
| Strawberry                                                                                                          | 49 (25)               | 23 (15)           |                     |
| No flavour                                                                                                          | 45 (23)               | 0 (0)             |                     |
| Lemon ; orange ; peach-apricot                                                                                      | 30 (15)               | 14 (9)            |                     |
| Orange                                                                                                              | 34 (18)               | 2 (1)             |                     |

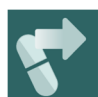

---

|                            |         |         |
|----------------------------|---------|---------|
| Banana                     | 0 (0)   | 23 (15) |
| Banana ; orange            | 21 (11) | 0 (0)   |
| Lemon ; peach ; strawberry | 2 (1)   | 17 (11) |
| E99 294 55                 | 1 (1)   | 18 (11) |
| Dark cherry                | 0 (0)   | 13 (8)  |
| Orange ; caramel           | 0 (0)   | 12 (8)  |
| Lemon ; orange             | 0 (0)   | 9 (6)   |
| Lemon ; peach ; strawberry | 3 (7)   | 0 (0)   |
| Other (<5%)                | 12 (6)  | 18 (11) |
| <i>missing data</i>        | 6       | 0       |

---

<sup>a</sup>  $\chi^2$ : Pearson's Chi-squared Test p-value ; <sup>b</sup> F: Fisher's exact test p-value

**Table S3.** Characteristics of the patients and products focusing on oral liquid formulations of antibiotics in toddlers and preschoolers in the study, stratified by patient exposure to treatment.

| Characteristics                                                                                                     | Previous exposure<br>(n = 148) | First exposure<br>(n = 209) | Statistical<br>Test       |
|---------------------------------------------------------------------------------------------------------------------|--------------------------------|-----------------------------|---------------------------|
| <b>Sex</b>                                                                                                          |                                |                             | $\chi^2$ a: $p=1$         |
| Girl                                                                                                                | 67 (46)                        | 96 (46)                     |                           |
| Boy                                                                                                                 | 80 (54)                        | 112 (54)                    |                           |
| missing data                                                                                                        | 1                              | 1                           |                           |
| <b>Age group</b>                                                                                                    |                                |                             | $\chi^2$ : $p=.21$        |
| Toddlers (2y.)                                                                                                      | 65 (44)                        | 107 (51)                    |                           |
| Preschoolers (3-5y.)                                                                                                | 83 (56)                        | 102 (49)                    |                           |
| <b>Setting</b>                                                                                                      |                                |                             | $\chi^2$ : $p=.76$        |
| Community                                                                                                           | 67 (45)                        | 90 (43)                     |                           |
| Hospital                                                                                                            | 81 (55)                        | 119 (57)                    |                           |
| <b>Country</b>                                                                                                      |                                |                             | $\chi^2$ : $p<.001$       |
| France                                                                                                              | 71 (48)                        | 62 (30)                     |                           |
| Morocco                                                                                                             | 29 (20)                        | 39 (19)                     |                           |
| Japan                                                                                                               | 27 (18)                        | 43 (21)                     |                           |
| Norway                                                                                                              | 6 (4)                          | 28 (13)                     |                           |
| India                                                                                                               | 0 (0)                          | 15 (7)                      |                           |
| Germany                                                                                                             | 0 (0)                          | 21 (10)                     |                           |
| England                                                                                                             | 15 (10)                        | 1 (0)                       |                           |
| <b>5<sup>th</sup> level (chemical substance) of the Anatomical Therapeutic Chemical (ATC) classification system</b> |                                |                             | $\chi^2$ : $p<.001$       |
| Co-amoxiclav                                                                                                        | 40 (19)                        | 34 (23)                     |                           |
| Amoxicillin                                                                                                         | 27 (13)                        | 28 (19)                     |                           |
| Sulfamethoxazole and trimethoprim                                                                                   | 11 (5)                         | 26 (18)                     |                           |
| Cefaclor                                                                                                            | 30 (14)                        | 4 (3)                       |                           |
| Cefpodoxime                                                                                                         | 18 (9)                         | 15 (10)                     |                           |
| Cefixime                                                                                                            | 16 (8)                         | 10 (7)                      |                           |
| Phenoxymethylpenicillin                                                                                             | 19 (9)                         | 6 (4)                       |                           |
| Josamycin                                                                                                           | 16 (8)                         | 7 (5)                       |                           |
| Fusidic acid                                                                                                        | 11 (5)                         | 10 (7)                      |                           |
| Other (<5%)                                                                                                         | 21 (10)                        | 8 (5)                       |                           |
| <b>Pharmaceutical form categories</b>                                                                               |                                |                             | $\chi^2$ : $p=.91$        |
| Reconstituted oral liquids                                                                                          | 180 (86)                       | 126 (85)                    |                           |
| Ready to-use oral liquids                                                                                           | 29 (14)                        | 22 (15)                     |                           |
| <b>Provided administration device</b>                                                                               |                                |                             | F <sup>b</sup> : $p<.001$ |
| Oral syringe                                                                                                        | 51 (37)                        | 78 (40)                     |                           |
| Measuring spoon                                                                                                     | 59 (43)                        | 55 (28)                     |                           |
| Device not provided                                                                                                 | 27 (20)                        | 44 (23)                     |                           |
| Measuring cup                                                                                                       | 0 (0)                          | 15 (8)                      |                           |
| Other (<5%)                                                                                                         | 0 (0)                          | 1 (1)                       |                           |
| missing data                                                                                                        | 11                             | 16                          |                           |
| <b>Flavor composition</b>                                                                                           |                                |                             | $\chi^2$ : $p=.001$       |
| Strawberry                                                                                                          | 28 (20)                        | 44 (21)                     |                           |
| No flavour                                                                                                          | 23 (16)                        | 22 (11)                     |                           |
| Lemon ; orange ; peach-apricot                                                                                      | 18 (13)                        | 26 (12)                     |                           |
| Orange                                                                                                              | 5 (4)                          | 31 (15)                     |                           |

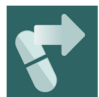

---

|                            |         |         |
|----------------------------|---------|---------|
| Banana                     | 12 (8)  | 11 (5)  |
| Banana ; orange            | 10 (7)  | 11 (5)  |
| Lemon ; peach ; strawberry | 10 (7)  | 9 (4)   |
| E99 294 55                 | 13 (9)  | 6 (3)   |
| Orange ; caramel           | 1 (1)   | 11 (5)  |
| Other (<5%)                | 22 (15) | 38 (18) |
| <i>missing data</i>        | 6       | 0       |

---

<sup>a</sup>  $\chi^2$ : Pearson's Chi-squared Test p-value ; <sup>b</sup> F: Fisher's exact test p-value

**Table S4.** Characteristics of the patients and products focusing on oral liquid formulations of antibiotics in toddlers and preschoolers in the study, stratified by patient sex.

| Characteristics                                                                                                     | Boys<br>(n = 192) | Girls<br>(n = 163) | Statistical<br>Test |
|---------------------------------------------------------------------------------------------------------------------|-------------------|--------------------|---------------------|
| <b>Age group</b>                                                                                                    |                   |                    | $\chi^2$ : $p=.83$  |
| Toddlers (2y.)                                                                                                      | 91 (47)           | 80 (49)            |                     |
| Preschoolers (3-5y.)                                                                                                | 101 (53)          | 83 (51)            |                     |
| <b>Treatment exposure</b>                                                                                           |                   |                    | $\chi^2$ : $p=1$    |
| Previous exposure                                                                                                   | 80 (42)           | 67 (41)            |                     |
| First exposure                                                                                                      | 112 (58)          | 96 (59)            |                     |
| <b>Setting</b>                                                                                                      |                   |                    | $\chi^2$ : $p=.38$  |
| Community                                                                                                           | 89 (46)           | 67 (41)            |                     |
| Hospital                                                                                                            | 103 (54)          | 96 (59)            |                     |
| <b>Country</b>                                                                                                      |                   |                    | $\chi^2$ : $p=.75$  |
| France                                                                                                              | 74 (39)           | 58 (36)            |                     |
| Morocco                                                                                                             | 33 (17)           | 34 (21)            |                     |
| Japan                                                                                                               | 42 (22)           | 28 (17)            |                     |
| Norway                                                                                                              | 18 (9)            | 16 (10)            |                     |
| India                                                                                                               | 6 (3)             | 9 (6)              |                     |
| Germany                                                                                                             | 10 (5)            | 11 (7)             |                     |
| England                                                                                                             | 9 (5)             | 7 (4)              |                     |
| <b>5<sup>th</sup> level (chemical substance) of the Anatomical Therapeutic Chemical (ATC) classification system</b> |                   |                    | $\chi^2$ : $p=.024$ |
| Co-amoxiclav                                                                                                        | 44 (23)           | 30 (18)            |                     |
| Amoxicillin                                                                                                         | 29 (15)           | 25 (15)            |                     |
| Sulfamethoxazole and trimethoprim                                                                                   | 18 (9)            | 19 (12)            |                     |
| Cefaclor                                                                                                            | 26 (14)           | 8 (5)              |                     |
| Cefpodoxime                                                                                                         | 17 (9)            | 16 (10)            |                     |
| Cefixime                                                                                                            | 16 (8)            | 10 (6)             |                     |
| Phenoxymethylpenicillin                                                                                             | 15 (8)            | 10 (6)             |                     |
| Josamycin                                                                                                           | 11 (6)            | 11 (7)             |                     |
| Fusidic acid                                                                                                        | 7 (4)             | 14 (9)             |                     |
| Other (<5%)                                                                                                         | 9 (5)             | 20 (12)            |                     |
| <b>Pharmaceutical form categories</b>                                                                               |                   |                    | $\chi^2$ : $p=.014$ |
| Reconstituted oral liquids                                                                                          | 173 (90)          | 131 (80)           |                     |
| Ready to-use oral liquids                                                                                           | 19 (10)           | 32 (20)            |                     |
| <b>Provided administration device</b>                                                                               |                   |                    | $F^b$ : $p=.23$     |
| Oral syringe                                                                                                        | 73 (41)           | 55 (36)            |                     |
| Measuring spoon                                                                                                     | 55 (31)           | 58 (38)            |                     |
| Device not provided                                                                                                 | 43 (24)           | 28 (19)            |                     |
| Measuring cup                                                                                                       | 6 (3)             | 9 (6)              |                     |
| Other (<5%)                                                                                                         | 0 (0)             | 1 (1)              |                     |
| missing data                                                                                                        | 15                | 12                 |                     |
| <b>Flavor composition</b>                                                                                           |                   |                    | $\chi^2$ : $p=.014$ |
| Strawberry                                                                                                          | 42 (22)           | 29 (18)            |                     |
| No flavour                                                                                                          | 21 (11)           | 24 (15)            |                     |
| Lemon ; orange ; peach-apricot                                                                                      | 19 (10)           | 24 (15)            |                     |
| Orange                                                                                                              | 27 (14)           | 9 (6)              |                     |
| Banana                                                                                                              | 11 (6)            | 12 (8)             |                     |



---

|                            |         |         |
|----------------------------|---------|---------|
| Banana ; orange            | 7 (4)   | 14 (9)  |
| Lemon ; peach ; strawberry | 15 (8)  | 4 (2)   |
| E99 294 55                 | 11 (6)  | 8 (5)   |
| Other (<5%)                | 36 (19) | 36 (22) |
| <i>missing data</i>        | 3       | 3       |

---

<sup>a</sup>  $\chi^2$ : Pearson's Chi-squared Test p-value ; <sup>b</sup> F: Fisher's exact test p-value



**Table S5.** Characteristics of the patients and products focusing on oral liquid formulations of co-amoxiclav in toddlers and preschoolers in the study, stratified by patient sex.

| Characteristics                       | Boys<br>(n = 44) | Girls<br>(n = 30) | Statistical<br>Test |
|---------------------------------------|------------------|-------------------|---------------------|
| <b>Age group</b>                      |                  |                   | $\chi^2$ : $p=.48$  |
| Toddlers (2y.)                        | 20 (45)          | 17 (57)           |                     |
| Preschoolers (3-5y.)                  | 24 (55)          | 13 (43)           |                     |
| <b>Treatment exposure</b>             |                  |                   | $\chi^2$ : $p=.89$  |
| Previous exposure                     | 21 (48)          | 13 (43)           |                     |
| First exposure                        | 23 (52)          | 17 (57)           |                     |
| <b>Setting</b>                        |                  |                   | $\chi^2$ : $p=.48$  |
| Community                             | 21 (48)          | 11 (37)           |                     |
| Hospital                              | 23 (52)          | 19 (63)           |                     |
| <b>Country</b>                        |                  |                   | $F^b$ : $p=.16$     |
| France                                | 21 (48)          | 12 (40)           |                     |
| Morocco                               | 8 (18)           | 1 (3)             |                     |
| India                                 | 1 (2)            | 3 (10)            |                     |
| Germany                               | 9 (20)           | 9 (30)            |                     |
| England                               | 5 (11)           | 5 (17)            |                     |
| <b>Pharmaceutical form categories</b> |                  |                   | $\chi^2$ : $p=.18$  |
| Reconstituted oral liquids            | 41 (93)          | 24 (80)           |                     |
| Ready to-use oral liquids             | 3 (7)            | 6 (20)            |                     |
| <b>Provided administration device</b> |                  |                   | $F^b$ : $p=.46$     |
| Oral syringe                          | 35 (88)          | 22 (81)           |                     |
| Measuring spoon                       | 3 (8)            | 2 (7)             |                     |
| Measuring cup                         | 1 (2)            | 3 (11)            |                     |
| Other (<5%)                           | 1 (2)            | 0 (0)             |                     |
| missing data                          | 4                | 3                 |                     |
| <b>Flavor composition</b>             |                  |                   | $F$ : $p=.23$       |
| Lemon ; orange ; peach-apricot        | 12 (29)          | 11 (41)           |                     |
| Strawberry                            | 15 (36)          | 5 (19)            |                     |
| E99 294 55                            | 11 (26)          | 8 (30)            |                     |
| No flavour                            | 1 (2)            | 2 (7)             |                     |
| Lemon ; peach ; strawberry            | 3 (7)            | 0 (0)             |                     |
| Other (<5%)                           | 0 (0)            | 1 (4)             |                     |
| missing data                          | 2                | 3                 |                     |

<sup>a</sup>  $\chi^2$ : Pearson's Chi-squared Test p-value ; <sup>b</sup>  $F$ : Fisher's exact test p-value

**Table S6.** Characteristics of the patients and products focusing on oral liquid formulations of antibiotics with lemon flavor in the list of excipients in toddlers and preschoolers in the study, stratified by patient sex.

| Characteristics                                                                                                     | Boys<br>(n = 39) | Girls<br>(n = 32) | Statistical<br>Test |
|---------------------------------------------------------------------------------------------------------------------|------------------|-------------------|---------------------|
| <b>Age group</b>                                                                                                    |                  |                   | $\chi^2$ : $p=.86$  |
| Toddlers (2y.)                                                                                                      | 20 (51)          | 18 (56)           |                     |
| Preschoolers (3-5y.)                                                                                                | 19 (49)          | 14 (44)           |                     |
| <b>Treatment exposure</b>                                                                                           |                  |                   | $\chi^2$ : $p=.62$  |
| Previous exposure                                                                                                   | 18 (46)          | 12 (38)           |                     |
| First exposure                                                                                                      | 21 (54)          | 20 (62)           |                     |
| <b>Setting</b>                                                                                                      |                  |                   | $\chi^2$ : $p=.61$  |
| Community                                                                                                           | 23 (59)          | 16 (50)           |                     |
| Hospital                                                                                                            | 16 (41)          | 16 (50)           |                     |
| <b>Country</b>                                                                                                      |                  |                   | $\chi^2$ : $p=.7$   |
| France                                                                                                              | 24 (62)          | 19 (59)           |                     |
| Morocco                                                                                                             | 2 (5)            | 0 (0)             |                     |
| Germany                                                                                                             | 10 (26)          | 11 (34)           |                     |
| England                                                                                                             | 3 (8)            | 2 (6)             |                     |
| <b>5<sup>th</sup> level (chemical substance) of the Anatomical Therapeutic Chemical (ATC) classification system</b> |                  |                   | $\chi^2$ : $p=.93$  |
| Amoxicillin                                                                                                         | 19 (49)          | 17 (53)           |                     |
| Co-amoxiclav                                                                                                        | 15 (38)          | 11 (34)           |                     |
| Cefpodoxime                                                                                                         | 5 (13)           | 4 (12)            |                     |
| <b>Pharmaceutical form categories</b>                                                                               |                  |                   |                     |
| Reconstituted oral liquids                                                                                          | 39 (100)         | 32 (100)          |                     |
| <b>Provided administration device</b>                                                                               |                  |                   | $F^b$ : $p=1$       |
| Measuring spoon                                                                                                     | 22 (59)          | 19 (59)           |                     |
| Oral syringe                                                                                                        | 14 (38)          | 13 (41)           |                     |
| Other (<5%)                                                                                                         | 1 (3)            | 0 (0)             |                     |
| missing data                                                                                                        | 2                | 0                 |                     |
| <b>Flavor composition</b>                                                                                           |                  |                   | $\chi^2$ : $p=.04$  |
| Lemon ; orange ; peach-apricot                                                                                      | 19 (49)          | 24 (75)           |                     |
| Lemon ; peach ; strawberry                                                                                          | 15 (38)          | 4 (12)            |                     |
| Lemon ; orange                                                                                                      | 5 (13)           | 4 (12)            |                     |

<sup>a</sup>  $\chi^2$ : Pearson's Chi-squared Test p-value ; <sup>b</sup> F: Fisher's exact test p-value

**Table S7.** Characteristics of the patients and products focusing on oral liquid formulations of antibiotics with strawberry flavor in the list of excipients in toddlers and preschoolers in the study, stratified by patient sex.

| Characteristics                                                                                                     | Boys<br>(n = 57) | Girls<br>(n = 35) | Statistical<br>Test   |
|---------------------------------------------------------------------------------------------------------------------|------------------|-------------------|-----------------------|
| <b>Age group</b>                                                                                                    |                  |                   | $\chi^{2a}$ : $p=.93$ |
| Toddlers (2y.)                                                                                                      | 23 (40)          | 13 (37)           |                       |
| Preschoolers (3-5y.)                                                                                                | 34 (60)          | 22 (63)           |                       |
| <b>Treatment exposure</b>                                                                                           |                  |                   | $\chi^2$ : $p=.08$    |
| Previous exposure                                                                                                   | 28 (49)          | 10 (29)           |                       |
| First exposure                                                                                                      | 29 (51)          | 25 (71)           |                       |
| <b>Setting</b>                                                                                                      |                  |                   | $\chi^2$ : $p=.05$    |
| Community                                                                                                           | 31 (54)          | 11 (31)           |                       |
| Hospital                                                                                                            | 26 (46)          | 24 (69)           |                       |
| <b>Country</b>                                                                                                      |                  |                   | $F^b$ : $p=.012$      |
| France                                                                                                              | 31 (54)          | 11 (31)           |                       |
| Morocco                                                                                                             | 26 (46)          | 20 (57)           |                       |
| Japan                                                                                                               | 0 (0)            | 3 (9)             |                       |
| India                                                                                                               | 0 (0)            | 1 (3)             |                       |
| <b>5<sup>th</sup> level (chemical substance) of the Anatomical Therapeutic Chemical (ATC) classification system</b> |                  |                   | $F$ : $p=.05$         |
| Cefixime                                                                                                            | 16 (28)          | 10 (29)           |                       |
| Co-amoxiclav                                                                                                        | 18 (32)          | 6 (17)            |                       |
| Josamycin                                                                                                           | 11 (19)          | 11 (31)           |                       |
| Amoxicillin                                                                                                         | 12 (21)          | 4 (11)            |                       |
| Cefalexin                                                                                                           | 0 (0)            | 3 (9)             |                       |
| Other (<5%)                                                                                                         | 0 (0)            | 1 (3)             |                       |
| <b>Pharmaceutical form categories</b>                                                                               |                  |                   | $F$ : $p=.38$         |
| Reconstituted oral liquids                                                                                          | 57 (100)         | 34 (97)           |                       |
| Ready to-use oral liquids                                                                                           | 0 (0)            | 1 (3)             |                       |
| <b>Provided administration device</b>                                                                               |                  |                   | $F$ : $p=.07$         |
| Oral syringe                                                                                                        | 42 (76)          | 26 (74)           |                       |
| Measuring spoon                                                                                                     | 12 (22)          | 4 (11)            |                       |
| Device not provided                                                                                                 | 1 (2)            | 3 (9)             |                       |
| Other (<5%)                                                                                                         | 0 (0)            | 2 (6)             |                       |
| missing data                                                                                                        | 2                | 0                 |                       |
| <b>Flavor composition</b>                                                                                           |                  |                   | $F$ : $p=.05$         |
| Strawberry                                                                                                          | 42 (74)          | 29 (83)           |                       |
| Lemon ; peach ; strawberry                                                                                          | 15 (26)          | 4 (11)            |                       |
| Other flavour label (<5%)                                                                                           | 0 (0)            | 2 (6)             |                       |

<sup>a</sup>  $\chi^2$ : Pearson's Chi-squared Test p-value ; <sup>b</sup>  $F$ : Fisher's exact test p-value

**Table S8.** Characteristics of the patients and products focusing on oral liquid formulations of antibiotics with banana flavor in the list of excipients in toddlers and preschoolers in the study, stratified by patient sex.

| Characteristics                                                                                                     | Boys<br>(n = 19) | Girls<br>(n = 29) | Statistical<br>Test |
|---------------------------------------------------------------------------------------------------------------------|------------------|-------------------|---------------------|
| <b>Age group</b>                                                                                                    |                  |                   | $\chi^2$ : $p=1$    |
| Toddlers (2y.)                                                                                                      | 10 (53)          | 15 (52)           |                     |
| Preschoolers (3-5y.)                                                                                                | 9 (47)           | 14 (48)           |                     |
| <b>Treatment exposure</b>                                                                                           |                  |                   | $\chi^2$ : $p=.29$  |
| Previous exposure                                                                                                   | 11 (58)          | 11 (38)           |                     |
| First exposure                                                                                                      | 8 (42)           | 18 (62)           |                     |
| <b>Setting</b>                                                                                                      |                  |                   | $\chi^2$ : $p=.63$  |
| Community                                                                                                           | 12 (63)          | 15 (52)           |                     |
| Hospital                                                                                                            | 7 (37)           | 14 (48)           |                     |
| <b>Country</b>                                                                                                      |                  |                   | $F^b$ : $p=.78$     |
| France                                                                                                              | 11 (58)          | 14 (48)           |                     |
| Morocco                                                                                                             | 7 (37)           | 14 (48)           |                     |
| Norway                                                                                                              | 1 (5)            | 1 (3)             |                     |
| <b>5<sup>th</sup> level (chemical substance) of the Anatomical Therapeutic Chemical (ATC) classification system</b> |                  |                   | $F$ : $p=.2$        |
| Cefpodoxime                                                                                                         | 11 (58)          | 12 (41)           |                     |
| Fusidic acid                                                                                                        | 7 (37)           | 14 (48)           |                     |
| Azithromycin                                                                                                        | 0 (0)            | 3 (10)            |                     |
| Sulfamethoxazole and trimethoprim                                                                                   | 1 (5)            | 0 (0)             |                     |
| <b>Pharmaceutical form categories</b>                                                                               |                  |                   | $\chi^2$ : $p=.9$   |
| Reconstituted oral liquids                                                                                          | 11 (58)          | 15 (52)           |                     |
| Ready to-use oral liquids                                                                                           | 8 (42)           | 14 (48)           |                     |
| <b>Provided administration device</b>                                                                               |                  |                   | $\chi^2$ : $p=.99$  |
| Measuring spoon                                                                                                     | 15 (83)          | 22 (79)           |                     |
| Oral syringe                                                                                                        | 3 (17)           | 6 (21)            |                     |
| missing data                                                                                                        | 1                | 1                 |                     |
| <b>Flavor composition</b>                                                                                           |                  |                   | $F$ : $p=.21$       |
| Banana                                                                                                              | 11 (58)          | 12 (41)           |                     |
| Banana ; orange                                                                                                     | 7 (37)           | 14 (48)           |                     |
| Banana ; cherry ; vanilla                                                                                           | 0 (0)            | 3 (10)            |                     |
| Banana ; vanilla                                                                                                    | 1 (5)            | 0 (0)             |                     |

<sup>a</sup>  $\chi^2$ : Pearson's Chi-squared Test p-value ; <sup>b</sup>  $F$ : Fisher's exact test p-value

**Table S9.** Characteristics of the patients and products focusing on oral liquid formulations of antibiotics with strawberry flavor in the list of excipients in toddlers and preschoolers in the study, stratified by active pharmaceutical ingredient.

| Characteristics                       | Cefixime<br>(n = 26) | Josamycin<br>(n = 23) | Co-amoxiclav<br>(n = 24) | Statistical<br>Test |
|---------------------------------------|----------------------|-----------------------|--------------------------|---------------------|
| <b>Sex</b>                            |                      |                       |                          | $\chi^2$ : $p=.22$  |
| Girl                                  | 10 (38)              | 11 (50)               | 6 (25)                   |                     |
| Boy                                   | 16 (62)              | 11 (50)               | 18 (75)                  |                     |
| missing data                          | 0                    | 1                     | 0                        |                     |
| <b>Age group</b>                      |                      |                       |                          | $\chi^2$ : $p=.22$  |
| Toddlers (2y.)                        | 6 (23)               | 9 (39)                | 11 (46)                  |                     |
| Preschoolers (3-5y.)                  | 20 (77)              | 14 (61)               | 13 (54)                  |                     |
| <b>Treatment exposure</b>             |                      |                       |                          | $\chi^2$ : $p=.39$  |
| Previous exposure                     | 10 (38)              | 7 (30)                | 12 (50)                  |                     |
| First exposure                        | 16 (62)              | 16 (70)               | 12 (50)                  |                     |
| <b>Setting</b>                        |                      |                       |                          | $\chi^2$ : $p=.009$ |
| Community                             | 5 (19)               | 6 (26)                | 14 (58)                  |                     |
| Hospital                              | 21 (81)              | 17 (74)               | 10 (42)                  |                     |
| <b>Country</b>                        |                      |                       |                          | $F^b$ : $p=.008$    |
| France                                | 5 (19)               | 6 (26)                | 14 (58)                  |                     |
| Morocco                               | 21 (81)              | 17 (74)               | 9 (38)                   |                     |
| India                                 | 0 (0)                | 0 (0)                 | 1 (4)                    |                     |
| <b>Pharmaceutical form categories</b> |                      |                       |                          | $F$ : $p=.64$       |
| Reconstituted oral liquids            | 26 (100)             | 23 (100)              | 23 (96)                  |                     |
| Ready to-use oral liquids             | 0 (0)                | 0 (0)                 | 1 (4)                    |                     |
| <b>Provided administration device</b> |                      |                       |                          | $F$ : $p=.09$       |
| Oral syringe                          | 26 (100)             | 23 (100)              | 20 (91)                  |                     |
| Measuring cup                         | 0 (0)                | 0 (0)                 | 1 (5)                    |                     |
| Device not provided                   | 0 (0)                | 0 (0)                 | 1 (5)                    |                     |
| missing data                          | 0                    | 0                     | 2                        |                     |
| <b>Flavor composition</b>             |                      |                       |                          | $F$ : $p=.03$       |
| Strawberry                            | 26 (100)             | 23 (100)              | 20 (83)                  |                     |
| Lemon ; peach ; strawberry            | 0 (0)                | 0 (0)                 | 3 (12)                   |                     |
| Caramel ; strawberry                  | 0 (0)                | 0 (0)                 | 1 (4)                    |                     |

<sup>a</sup>  $\chi^2$ : Pearson's Chi-squared Test p-value ; <sup>b</sup>  $F$ : Fisher's exact test p-value

**Table S10.** Characteristics of the patients and products focusing on oral liquid formulations of antibiotics in toddlers and preschoolers in the study, stratified by active pharmaceutical ingredient.

| Characteristics                               | Cefixime<br>(n = 26) | Cefaclor<br>(n = 34) | ST-mixture <sup>a</sup><br>(n = 37) | Co-amoxiclav<br>(n = 74) | Amoxicillin<br>(n = 55) | Cefpodoxime<br>(n = 33) | Phenoxymeth<br>ylpenicillin<br>(n = 25) | Statistical<br>Test             |
|-----------------------------------------------|----------------------|----------------------|-------------------------------------|--------------------------|-------------------------|-------------------------|-----------------------------------------|---------------------------------|
| <b>Sex</b>                                    |                      |                      |                                     |                          |                         |                         |                                         | $\chi^2$ <sup>b</sup> : $p=.29$ |
| Girl                                          | 10 (38)              | 8 (24)               | 19 (51)                             | 30 (41)                  | 25 (46)                 | 16 (48)                 | 10 (40)                                 |                                 |
| Boy                                           | 16 (62)              | 26 (76)              | 18 (49)                             | 44 (59)                  | 29 (54)                 | 17 (52)                 | 15 (60)                                 |                                 |
| missing data                                  | 0                    | 0                    | 0                                   | 0                        | 1                       | 0                       | 0                                       |                                 |
| <b>Age group</b>                              |                      |                      |                                     |                          |                         |                         |                                         | $\chi^2$ : $p=.005$             |
| Toddlers (2y.)                                | 6 (23)               | 10 (29)              | 21 (57)                             | 37 (50)                  | 30 (55)                 | 19 (58)                 | 17 (68)                                 |                                 |
| Preschoolers (3-5y.)                          | 20 (77)              | 24 (71)              | 16 (43)                             | 37 (50)                  | 25 (45)                 | 14 (42)                 | 8 (32)                                  |                                 |
| <b>Treatment exposure</b>                     |                      |                      |                                     |                          |                         |                         |                                         | $\chi^2$ : $p<.001$             |
| Previous exposure                             | 10 (38)              | 4 (12)               | 26 (70)                             | 34 (46)                  | 28 (51)                 | 15 (45)                 | 6 (24)                                  |                                 |
| First exposure                                | 16 (62)              | 30 (88)              | 11 (30)                             | 40 (54)                  | 27 (49)                 | 18 (55)                 | 19 (76)                                 |                                 |
| <b>Setting</b>                                |                      |                      |                                     |                          |                         |                         |                                         | $\chi^2$ : $p<.001$             |
| Community                                     | 5 (19)               | 0 (0)                | 3 (8)                               | 32 (43)                  | 43 (78)                 | 32 (97)                 | 22 (88)                                 |                                 |
| Hospital                                      | 21 (81)              | 34 (100)             | 34 (92)                             | 42 (57)                  | 12 (22)                 | 1 (3)                   | 3 (12)                                  |                                 |
| <b>Country</b>                                |                      |                      |                                     |                          |                         |                         |                                         | $F$ <sup>c</sup> : $p<.001$     |
| France                                        | 5 (19)               | 0 (0)                | 4 (11)                              | 33 (45)                  | 47 (85)                 | 32 (97)                 | 3 (12)                                  |                                 |
| Morocco                                       | 21 (81)              | 0 (0)                | 0 (0)                               | 9 (12)                   | 0 (0)                   | 0 (0)                   | 0 (0)                                   |                                 |
| Japan                                         | 0 (0)                | 34 (100)             | 31 (84)                             | 0 (0)                    | 2 (4)                   | 0 (0)                   | 0 (0)                                   |                                 |
| Norway                                        | 0 (0)                | 0 (0)                | 1 (3)                               | 0 (0)                    | 0 (0)                   | 0 (0)                   | 22 (88)                                 |                                 |
| India                                         | 0 (0)                | 0 (0)                | 1 (3)                               | 4 (5)                    | 2 (4)                   | 1 (3)                   | 0 (0)                                   |                                 |
| Germany                                       | 0 (0)                | 0 (0)                | 0 (0)                               | 18 (24)                  | 3 (5)                   | 0 (0)                   | 0 (0)                                   |                                 |
| England                                       | 0 (0)                | 0 (0)                | 0 (0)                               | 10 (14)                  | 1 (2)                   | 0 (0)                   | 0 (0)                                   |                                 |
| <b>Pharmaceutical<br/>form categories</b>     |                      |                      |                                     |                          |                         |                         |                                         | $F$ : $p=.032$                  |
| Reconstituted oral<br>liquids                 | 26 (100)             | 34 (100)             | 31 (84)                             | 65 (88)                  | 52 (95)                 | 32 (97)                 | 22 (88)                                 |                                 |
| Ready to-use oral<br>liquids                  | 0 (0)                | 0 (0)                | 6 (16)                              | 9 (12)                   | 3 (5)                   | 1 (3)                   | 3 (12)                                  |                                 |
| <b>Provided<br/>administration<br/>device</b> |                      |                      |                                     |                          |                         |                         |                                         | $F$ : $p<.001$                  |
| Oral syringe                                  | 26 (100)             | 0 (0)                | 0 (0)                               | 57 (85)                  | 0 (0)                   | 16 (48)                 | 0 (0)                                   |                                 |
| Measuring spoon                               | 0 (0)                | 0 (0)                | 4 (11)                              | 5 (7)                    | 50 (93)                 | 16 (48)                 | 15 (100)                                |                                 |
| Device not provided                           | 0 (0)                | 34 (100)             | 31 (86)                             | 1 (1)                    | 2 (4)                   | 0 (0)                   | 0 (0)                                   |                                 |
| Measuring cup                                 | 0 (0)                | 0 (0)                | 1 (3)                               | 4 (6)                    | 2 (4)                   | 1 (3)                   | 0 (0)                                   |                                 |
| missing data                                  | 0                    | 0                    | 1                                   | 7                        | 1                       | 0                       | 10                                      |                                 |
| <b>Flavor composition</b>                     |                      |                      |                                     |                          |                         |                         |                                         | $F$ : $p<.001$                  |
| Strawberry                                    | 26 (100)             | 0 (0)                | 0 (0)                               | 20 (29)                  | 0 (0)                   | 0 (0)                   | 0 (0)                                   |                                 |
| Lemon ; orange ;<br>peach-apricot             | 0 (0)                | 0 (0)                | 0 (0)                               | 23 (33)                  | 21 (39)                 | 0 (0)                   | 0 (0)                                   |                                 |
| No flavour                                    | 0 (0)                | 0 (0)                | 32 (86)                             | 3 (4)                    | 2 (4)                   | 1 (3)                   | 0 (0)                                   |                                 |
| Orange                                        | 0 (0)                | 34 (100)             | 0 (0)                               | 0 (0)                    | 0 (0)                   | 0 (0)                   | 2 (8)                                   |                                 |
| Banana                                        | 0 (0)                | 0 (0)                | 0 (0)                               | 0 (0)                    | 0 (0)                   | 23 (70)                 | 0 (0)                                   |                                 |
| Lemon ; peach ;<br>strawberry                 | 0 (0)                | 0 (0)                | 0 (0)                               | 3 (4)                    | 16 (30)                 | 0 (0)                   | 0 (0)                                   |                                 |



|                              |       |       |        |         |         |        |         |
|------------------------------|-------|-------|--------|---------|---------|--------|---------|
| E99 294 55                   | 0 (0) | 0 (0) | 0 (0)  | 19 (28) | 0 (0)   | 0 (0)  | 0 (0)   |
| Dark cherry                  | 0 (0) | 0 (0) | 0 (0)  | 0 (0)   | 13 (24) | 0 (0)  | 0 (0)   |
| Orange ; caramel             | 0 (0) | 0 (0) | 0 (0)  | 0 (0)   | 0 (0)   | 0 (0)  | 12 (48) |
| Lemon ; orange               | 0 (0) | 0 (0) | 0 (0)  | 0 (0)   | 0 (0)   | 9 (27) | 0 (0)   |
| Apricot ; grapefruit         | 0 (0) | 0 (0) | 0 (0)  | 0 (0)   | 0 (0)   | 0 (0)  | 8 (32)  |
| Eggs cream ; tutti<br>frutti | 0 (0) | 0 (0) | 4 (11) | 0 (0)   | 0 (0)   | 0 (0)  | 0 (0)   |
| Apricot                      | 0 (0) | 0 (0) | 0 (0)  | 0 (0)   | 0 (0)   | 0 (0)  | 3 (12)  |
| Other (<5%)                  | 0 (0) | 0 (0) | 1 (3)  | 1 (1)   | 2 (4)   | 0 (0)  | 0 (0)   |
| missing data                 | 0     | 0     | 0      | 5       | 1       | 0      | 0       |

<sup>a</sup> ST-mixutre: Sulfamethoxazole and trimethoprim ; <sup>b</sup>  $\chi^2$ : Pearson's Chi-squared Test p-value ; <sup>c</sup> F: Fisher's exact test p-value

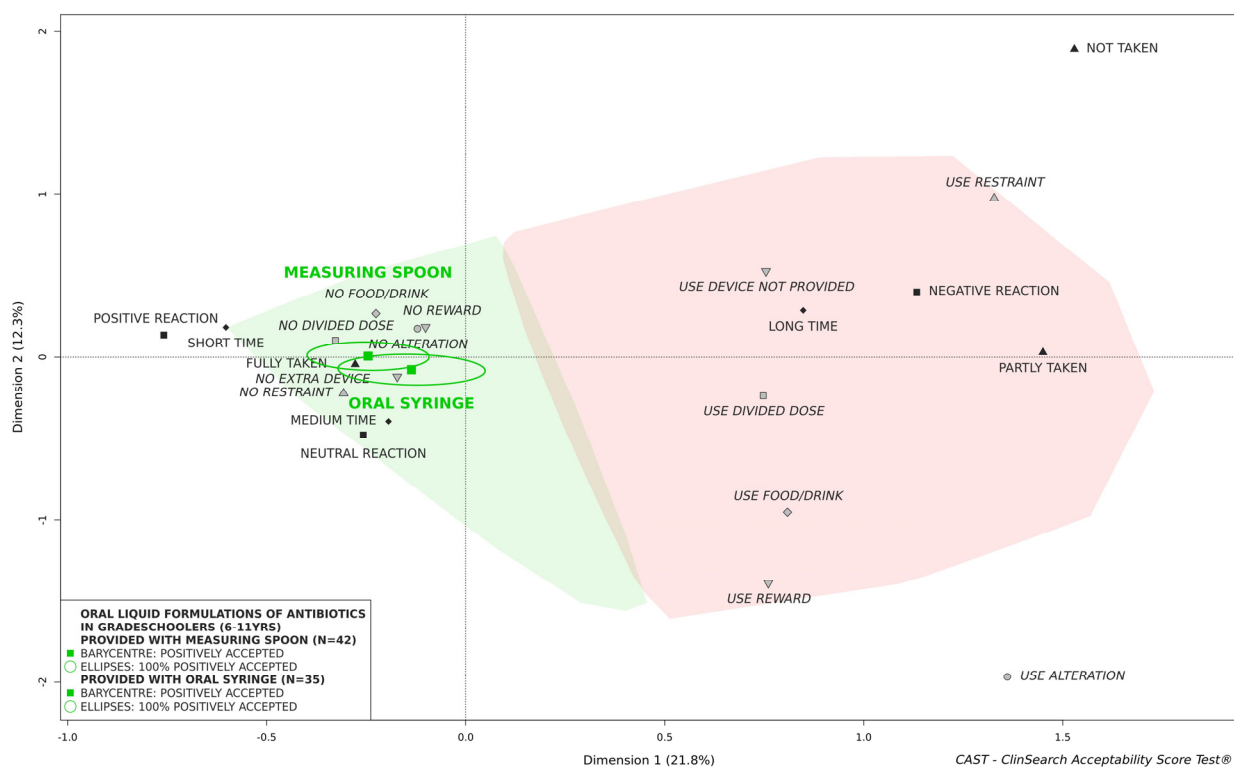

**Figure S1.** Acceptability of oral liquid formulations of antibiotics in grade-schoolers depending on administration device.

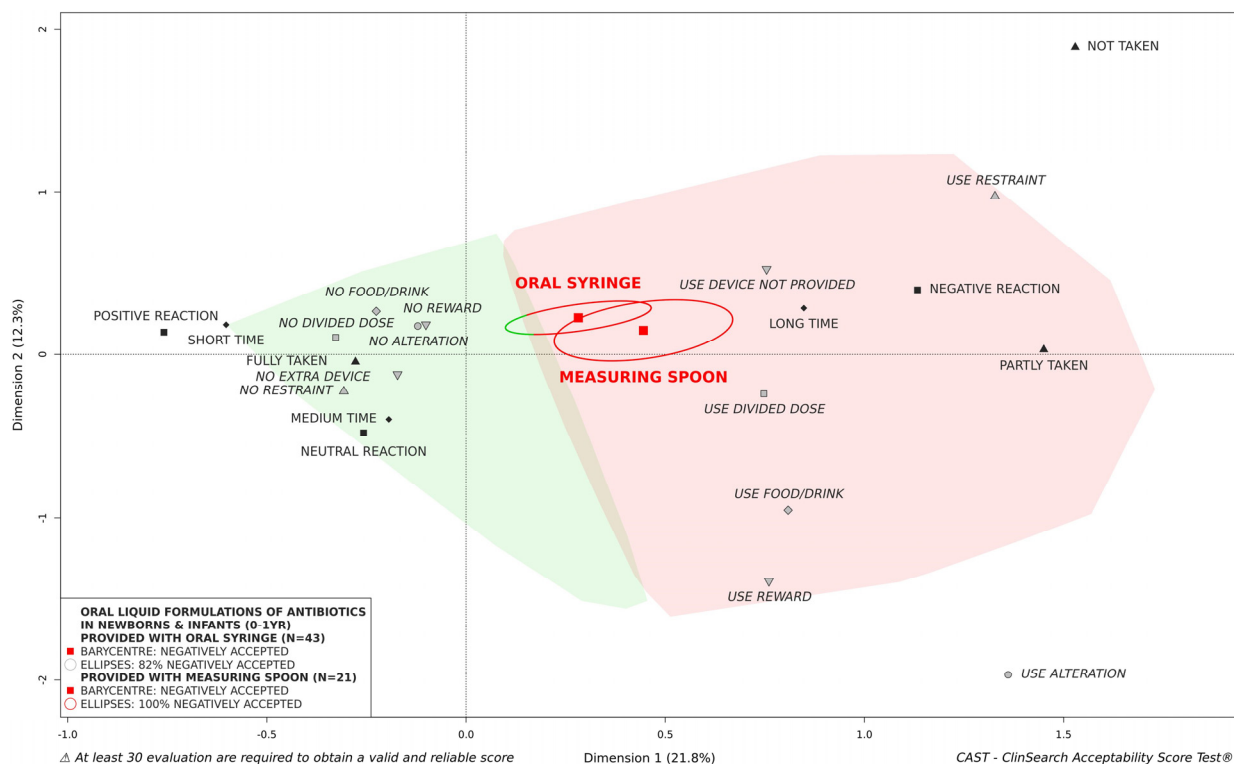

**Figure S2.** Acceptability of oral liquid formulations of antibiotics in newborns and infants depending on administration device.



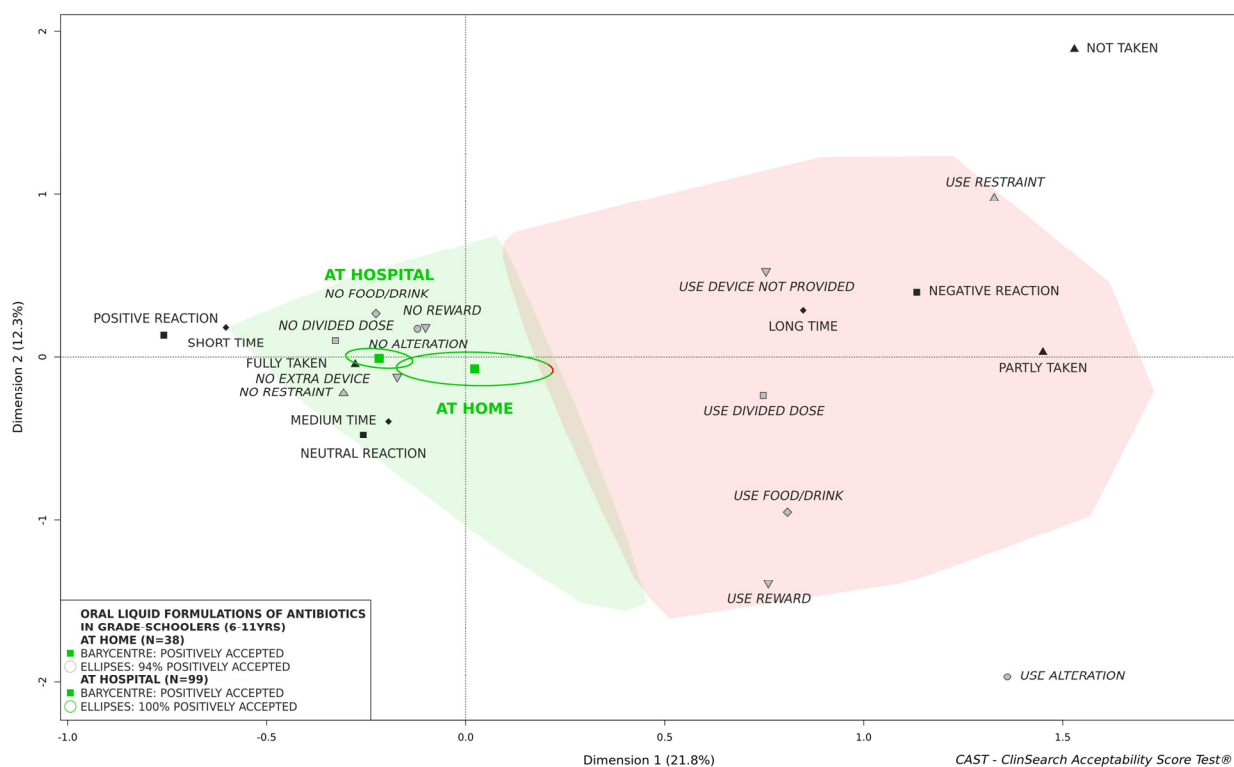

**Figure S3.** Acceptability of oral liquid formulations of antibiotics in grade-schoolers depending on place of administration.

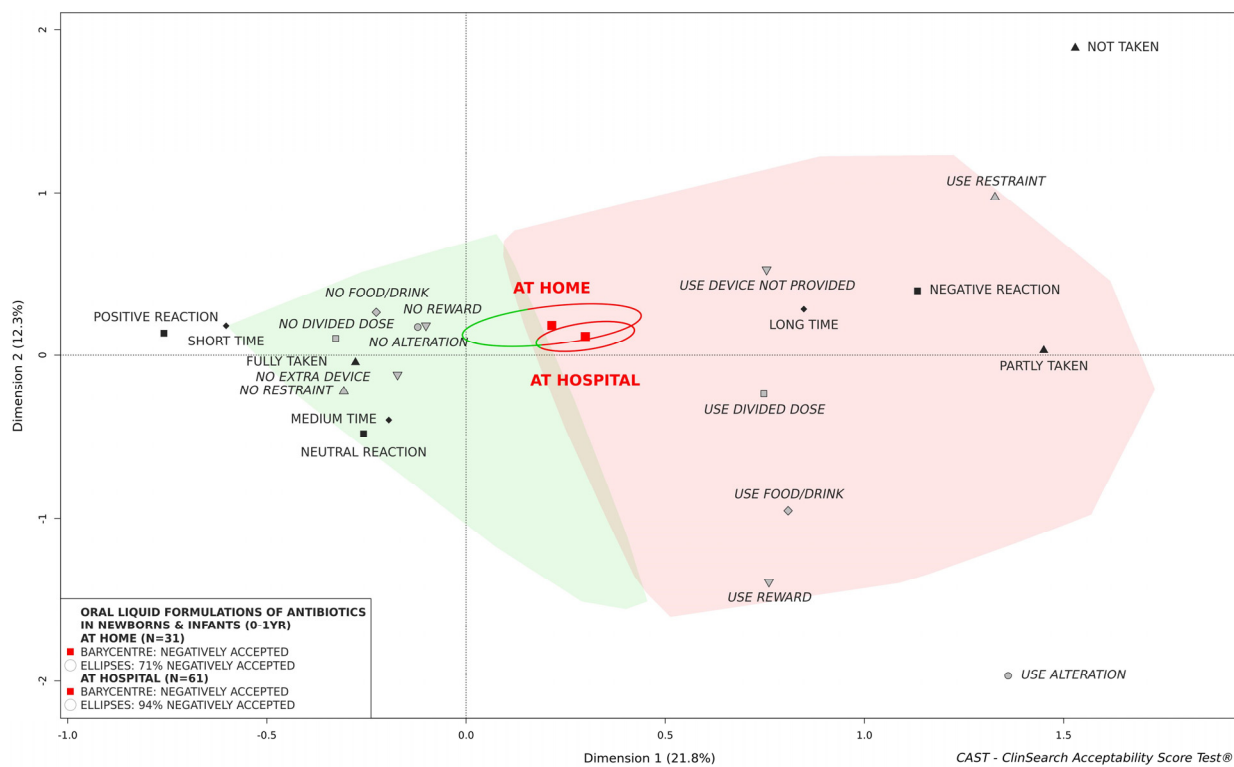

**Figure S4.** Acceptability of oral liquid formulations of antibiotics in newborns and infants depending on place of administration.

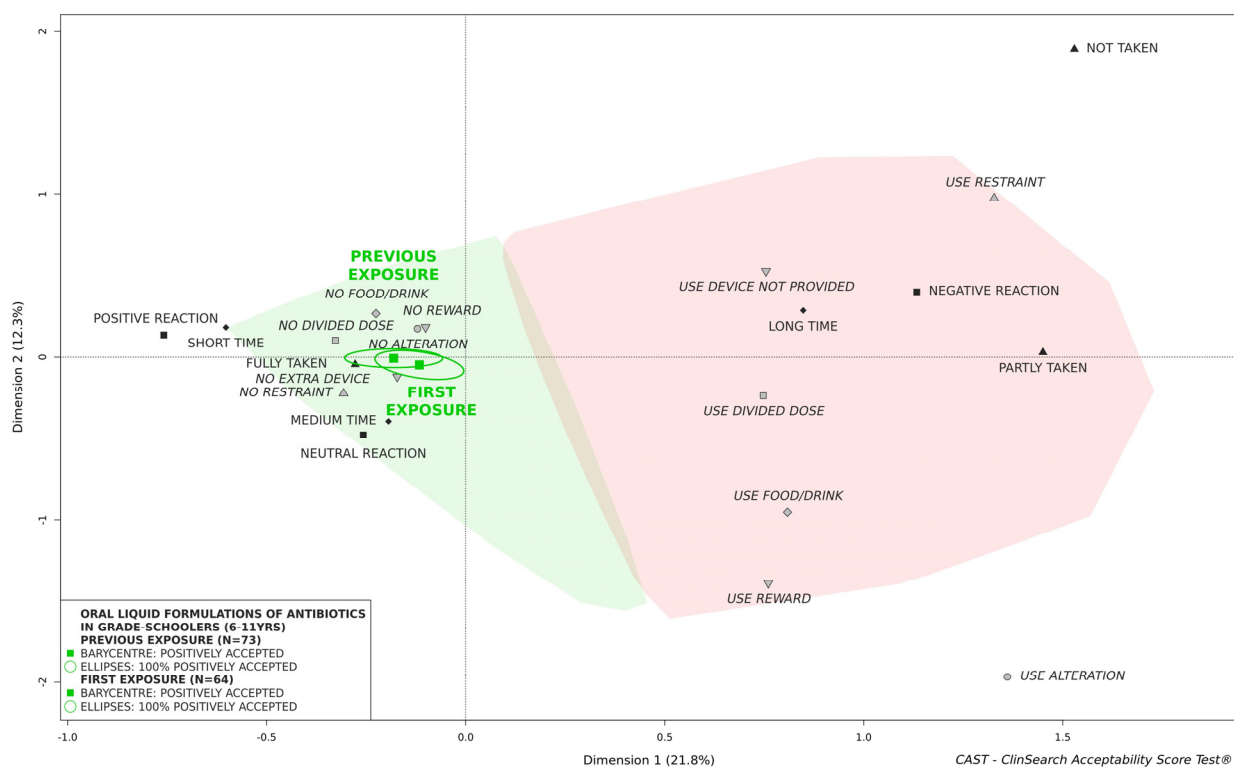

**Figure S5.** Acceptability of oral liquid formulations of antibiotics in grade-schoolers depending on exposure to treatment.

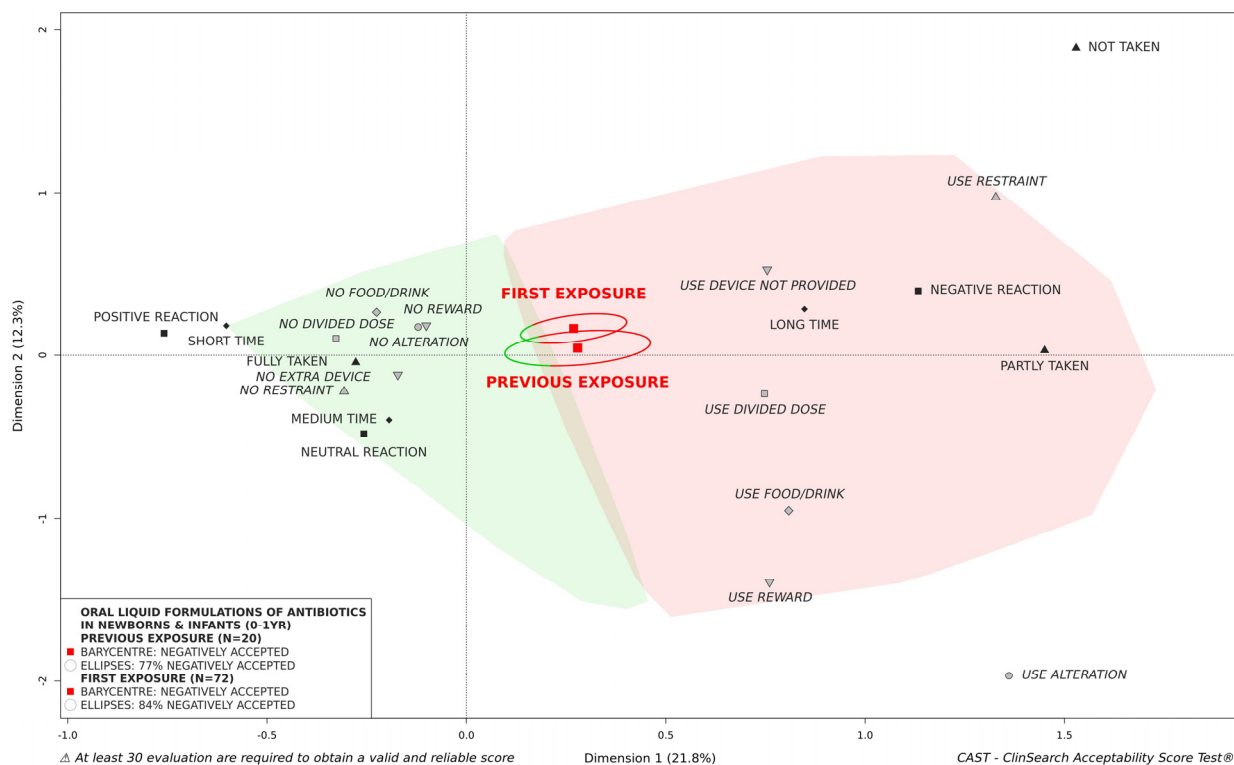

**Figure S6.** Acceptability of oral liquid formulations of antibiotics in newborns and infants depending on exposure to treatment.

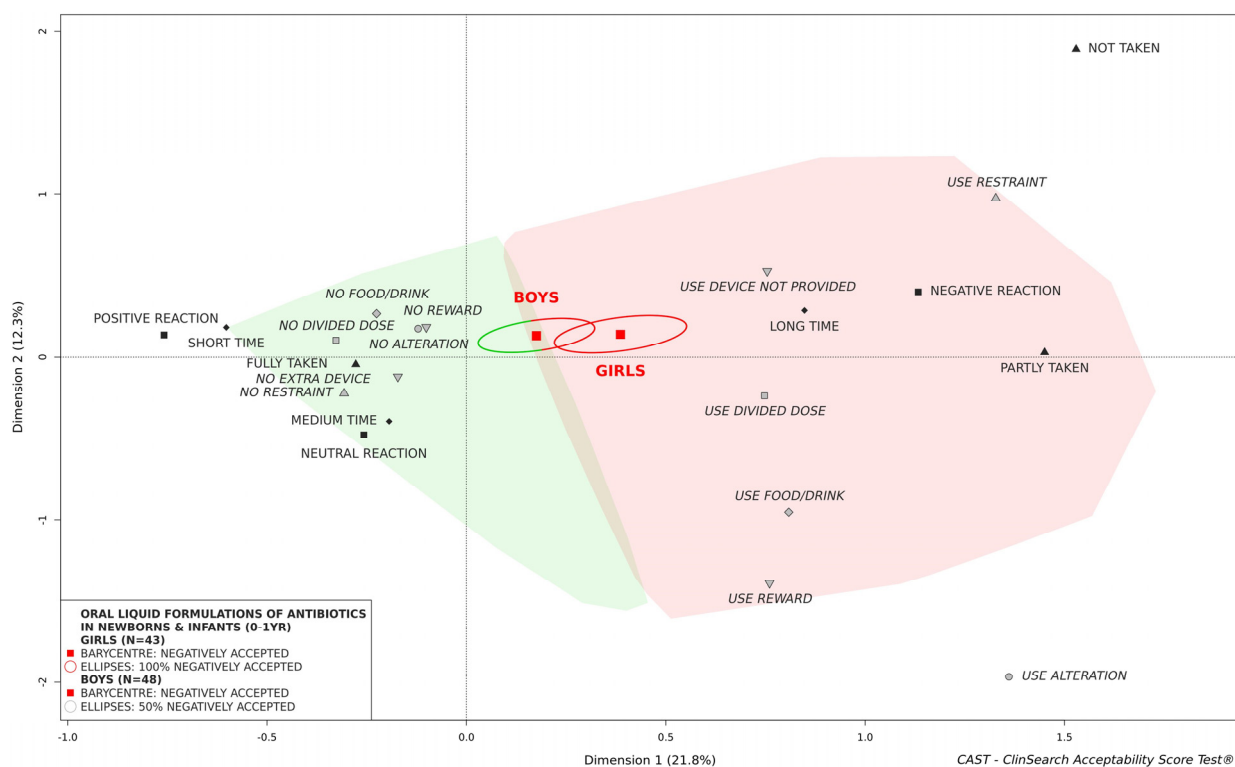

**Figure S7.** Acceptability of oral liquid formulations of antibiotics in newborns and infants depending on sex of patients.

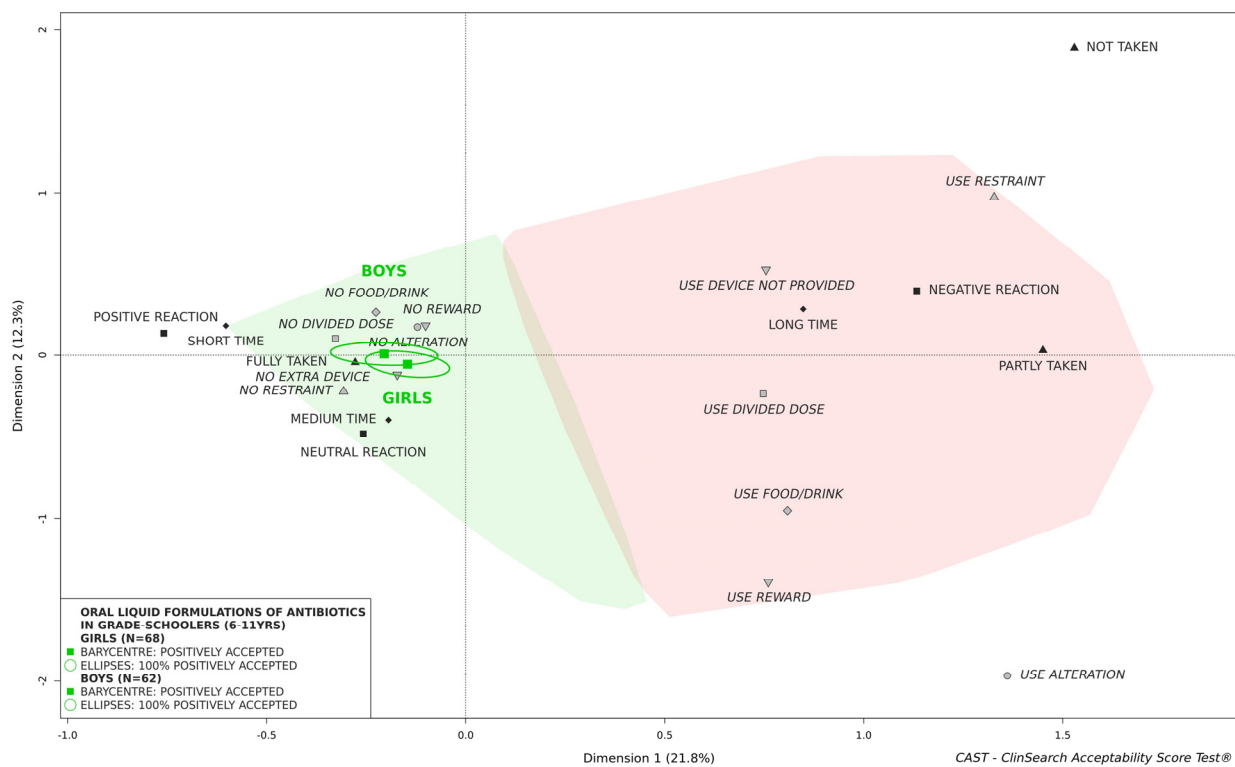

**Figure S8.** Acceptability of oral liquid formulations of antibiotics in grade-schoolers depending on sex of patients.

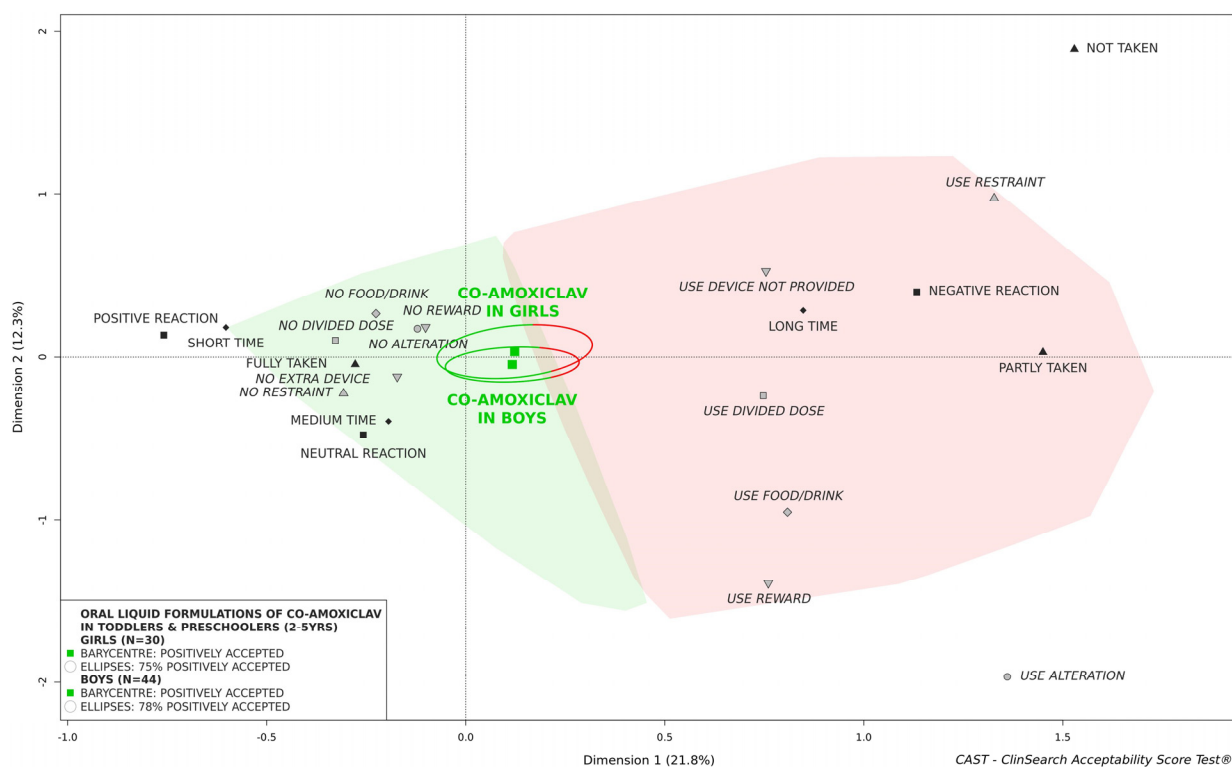

**Figure S9.** Acceptability of oral liquid formulations of co-amoxiclav in toddlers and preschoolers depending on the sex of patients.

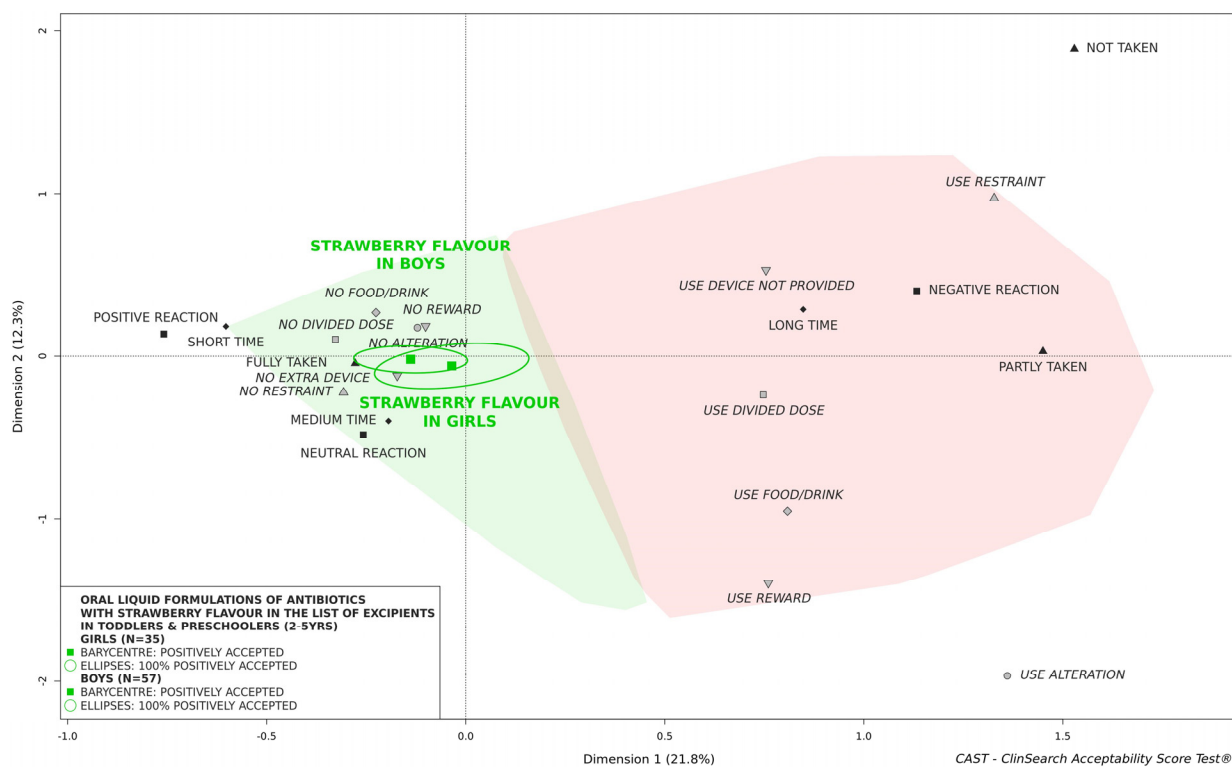

**Figure S10.** Acceptability of oral liquid formulations of antibiotics with strawberry flavor in the list of excipients in toddlers and preschoolers depending on the sex of patients.

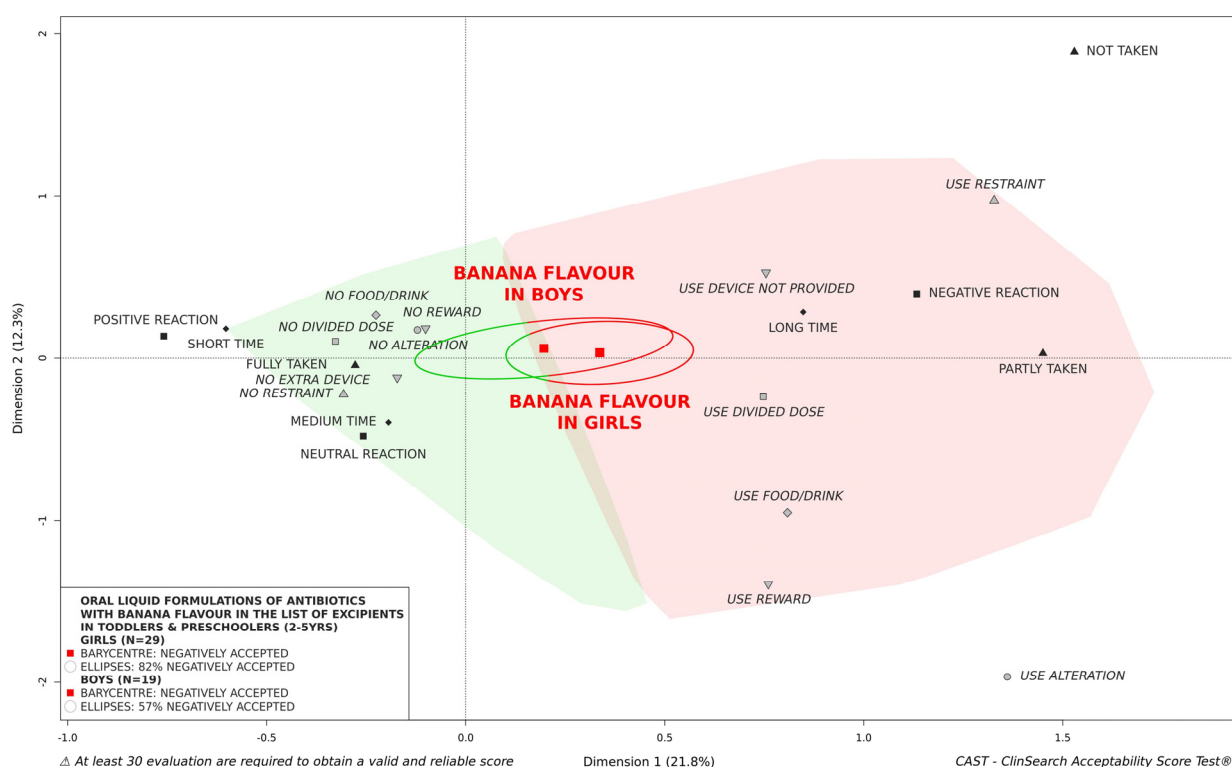

**Figure S11.** Acceptability of oral liquid formulations of antibiotics with banana flavor in the list of excipients in toddlers and preschoolers depending on the sex of patients.

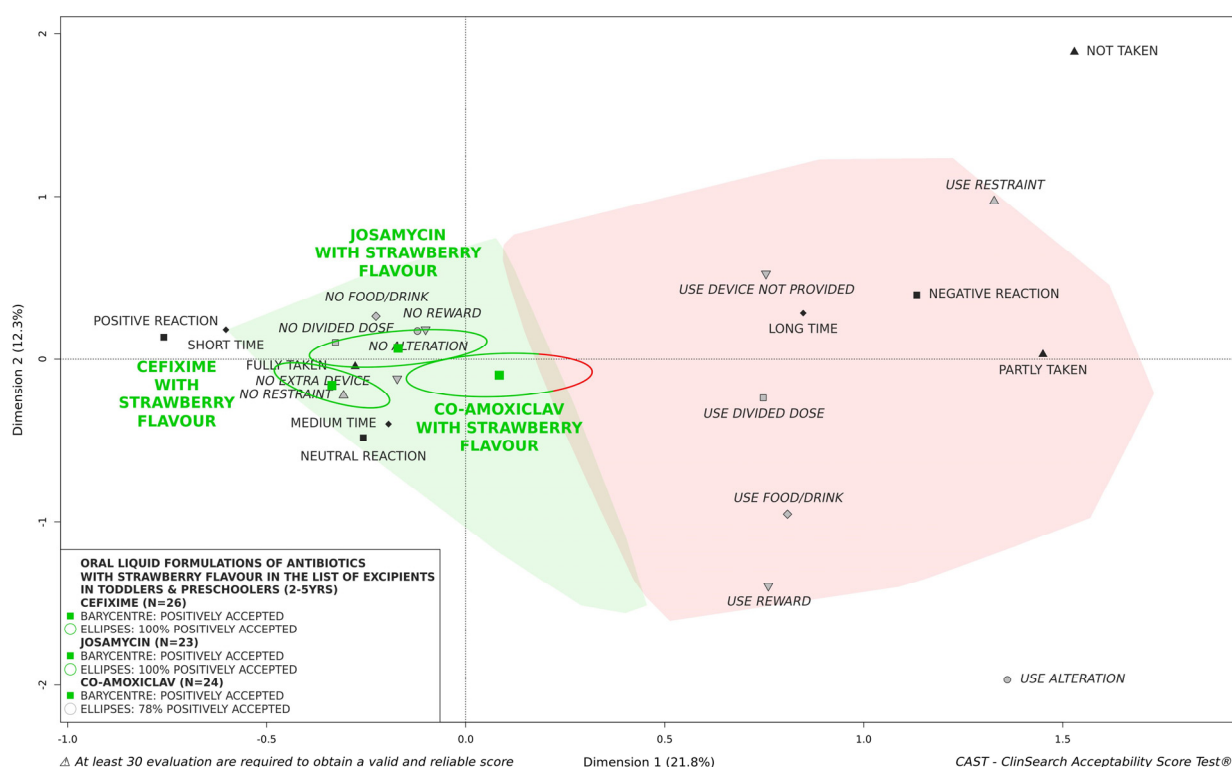

**Figure S12.** Acceptability of oral liquid formulations of antibiotics with strawberry flavor in the list of excipients in toddlers and preschoolers depending on active pharmaceutical ingredient.
